# Supplementary material for: Burnout in intensive care units - a consideration of the possible prevalence and frequency of new risk factors: a descriptive correlational multicentre study
Source: PubMed Central journal article supplement (PMC3826848; doi:10.1186/1471-2253-13-38), 2013-10-31
Supplement: 1471-2253-13-38-S1.pdf [file 1471-2253-13-38-S1.pdf]

## Electronic File 1 - Multivariate analyses of burnout risk factors – without including Profession

|                                                            | High Burnout  |                   |                   | OR**         | CI 95%             | p            |
|------------------------------------------------------------|---------------|-------------------|-------------------|--------------|--------------------|--------------|
|                                                            | Total (n=267) | High Burnout      |                   |              |                    |              |
|                                                            |               | No<br>(n=184-69%) | Yes<br>(n=83-31%) |              |                    |              |
| <b>GENDER, n (%)</b>                                       |               |                   |                   |              |                    |              |
| Female                                                     | 173(65)       | 116(63)           | 57(69)            | 1,000        | -                  |              |
| Male                                                       | 94(35)        | 68(37)            | 26(31)            | <b>0,534</b> | <b>0,347-0,820</b> | <b>0,004</b> |
| <b>OVERSCHEDULE</b>                                        |               |                   |                   |              |                    |              |
| <b>In another setting in the same institution, n (%)</b>   |               |                   |                   |              |                    |              |
| No                                                         | 212(89)       | 139(86)           | 73(95)            | 1,000        | -                  |              |
| Yes                                                        | 27(11)        | 23(14)            | 4(5)              | <b>0,173</b> | <b>0,040-0,749</b> | <b>0,019</b> |
| <b>CONFLICTS e, n (%)</b>                                  |               |                   |                   |              |                    |              |
| No                                                         | 193(80)       | 141(83)           | 52(72)            | 1,000        | -                  |              |
| Yes                                                        | 48(20)        | 28(17)            | 20(28)            | <b>2,279</b> | <b>1,308-3,969</b> | <b>0,004</b> |
| <b>ETHICAL DECISIONS, n (%)</b>                            |               |                   |                   |              |                    |              |
| <b>WITHDRAW TREATMENTS</b>                                 |               |                   |                   |              |                    |              |
| No                                                         | 158(65)       | 120(71)           | 38(52)            | 1,000        | -                  |              |
| Yes                                                        | 85(35)        | 50(29)            | 35(48)            | <b>2,126</b> | <b>1,262-3,582</b> | <b>0,005</b> |
| <b>WITHHOLD TREATMENTS</b>                                 |               |                   |                   |              |                    |              |
| No                                                         | 178(73)       | 133(78)           | 45(62)            | 1,000        | -                  |              |
| Yes                                                        | 66(27)        | 38(22)            | 28(38)            | 1,777        | 0,969-3,259        | <b>0,063</b> |
| <b>AGE, med (P25-P75)</b>                                  | 32(27-38)     | 33(28-40)         | 30(27-36)         | 0,976        | 0,909-1,048        | 0,497        |
| <b>MARITAL STATUS, n (%)</b>                               |               |                   |                   |              |                    |              |
| Single                                                     | 122(46)       | 74(40)            | 48(58)            | 1,000        | -                  |              |
| Married                                                    | 119(45)       | 90(49)            | 29(35)            | 0,907        | 0,401-2,051        | 0,814        |
| Divorced/Widower/Other                                     | 26(10)        | 20(11)            | 6(7)              | 0,619        | 0,124-3,099        | 0,560        |
| <b>WITH CHILDREN, n (%)</b>                                |               |                   |                   |              |                    |              |
| No                                                         | 173(65)       | 112(61)           | 61(74)            | 1,000        | -                  |              |
| Yes                                                        | 93(35)        | 72(39)            | 21(26)            | 1,645        | 0,586-4,612        | 0,344        |
| <b>NUMBER WORKING HOURS (week), n (%)</b>                  |               |                   |                   |              |                    |              |
| 35 hours                                                   | 99(37)        | 73(40)            | 26(31)            | 1,000        | -                  |              |
| 40 hours                                                   | 103(39)       | 63(34)            | 40(48)            | 0,769        | 0,268-2,202        | 0,624        |
| 42 hours                                                   | 41(15)        | 30(16)            | 11(13)            | 1,605        | 0,293-8,777        | 0,585        |
| Other                                                      | 24(9)         | 18(10)            | 6(7)              | 1,188        | 0,385-3,668        | 0,764        |
| <b>CONTRACTUAL SITUATION, n (%)</b>                        |               |                   |                   |              |                    |              |
| Effective staff member                                     | 114(43)       | 89(48)            | 25(30)            | 1,000        | -                  |              |
| Contract of indeterminate period                           | 109(41)       | 62(34)            | 47(57)            | 2,625        | 0,971-7,099        | 0,057        |
| Fixed-term contract / Without institutional link/<br>Other | 44(16)        | 33(18)            | 11(13)            | 0,914        | 0,358-2,331        | 0,851        |
| <b>DEATH OF A PATIENT, n (%)</b>                           |               |                   |                   |              |                    |              |
| No                                                         | 113(47)       | 84(50)            | 29(40)            | 1,000        | -                  |              |
| Yes                                                        | 126(53)       | 83(50)            | 43(60)            | 0,792        | 0,330-1,903        | 0,602        |
| <b>TERMINAL SEDATION</b>                                   |               |                   |                   |              |                    |              |
| No                                                         | 180(74)       | 134(79)           | 46(63)            | 1,000        | -                  |              |
| Yes                                                        | 63(26)        | 36(21)            | 27(37)            | 0,459        | 0,191-1,104        | 0,082        |
| <b>SAPS II, med (P25-P75)</b>                              | 45(40-51)     | 45(40-50)         | 50(41-51)         | 0,977        | 0,822-1,160        | 0,790        |
| <b>MORTALITY, med (P25-P75)</b>                            | 26(16-32)     | 23(14-26)         | 26(19-32)         | 1,107        | 0,955-1,282        | 0,178        |

High Burnout - High level of Burnout; OR\*\*- Multivariate Odds Ratio; CI -Confidence Interval; med-median; P-Percentil;
