# Supplementary material for: Burnout in intensive care units - a consideration of the possible prevalence and frequency of new risk factors: a descriptive correlational multicentre study
Source: PubMed Central journal article supplement (PMC3826848; doi:10.1186/1471-2253-13-38), 2013-10-31
Supplement: 1471-2253-13-38-S2.pdf [file 1471-2253-13-38-S2.pdf]

**Electronic File 2 - Comparison of the partially completed questionnaires regarding the 3 MBI dimensions with those that were fully completed**

|                                                                   | ICU Professionals |  | Questionnaires           |                         | P             |
|-------------------------------------------------------------------|-------------------|--|--------------------------|-------------------------|---------------|
|                                                                   | Total<br>(n=300)  |  | Incomplete<br>(n=33-11%) | Complete<br>(n=267-89%) |               |
| <b>1. Gender</b>                                                  |                   |  |                          |                         |               |
| Female                                                            | 195 (65)          |  | 22 (67)                  | 173 (65)                | 0,832*        |
| Male                                                              | 105 (35)          |  | 11 (33)                  | 94 (35)                 |               |
| <b>2. Age, med (P25-P75)</b>                                      | 32 (28-39)        |  | 36 (29-45)               | 32 (27-38)              | <b>0,039§</b> |
| <b>3. Marital Status</b>                                          |                   |  |                          |                         |               |
| Single                                                            | 133 (44)          |  | 11 (33)                  | 122 (46)                | -             |
| Married                                                           | 139 (46)          |  | 20 (61)                  | 119 (45)                |               |
| Divorced                                                          | 15 (5)            |  | 0 (0)                    | 15 (6)                  |               |
| Widower                                                           | 2 (1)             |  | 1 (3)                    | 1 (0)                   |               |
| Other                                                             | 11 (4)            |  | 1 (3)                    | 10 (4)                  |               |
| <b>4. With children</b>                                           |                   |  |                          |                         |               |
| No                                                                | 192 (64)          |  | 19 (58)                  | 173 (65)                | 0,399*        |
| Yes                                                               | 107 (36)          |  | 14 (42)                  | 93 (35)                 |               |
| <b>5. Religion</b>                                                |                   |  |                          |                         |               |
| No                                                                | 77 (26)           |  | 9 (27)                   | 68 (26)                 | 0,861*        |
| Yes                                                               | 219 (74)          |  | 24 (73)                  | 195 (74)                |               |
| <b>6. Profession</b>                                              |                   |  |                          |                         |               |
| Physician                                                         | 82 (27)           |  | 9 (27)                   | 73 (27)                 | 0,993*        |
| Nurse                                                             | 218 (73)          |  | 24 (73)                  | 194 (73)                |               |
| <b>7. Academic qualifications</b>                                 |                   |  |                          |                         |               |
| Bachelor / Graduation                                             | 280 (94)          |  | 30 (91)                  | 250 (94)                | 0,433**       |
| Master / PhD                                                      | 18 (6)            |  | 3 (9)                    | 15 (6)                  |               |
| <b>8. Post-graduate training in Intensive Care</b>                |                   |  |                          |                         |               |
| No                                                                | 215 (75)          |  | 22 (69)                  | 193 (75)                | 0,416*        |
| Yes                                                               | 73 (25)           |  | 10 (31)                  | 63 (25)                 |               |
| <b>9. Shift work</b>                                              |                   |  |                          |                         |               |
| No                                                                | 45 (15)           |  | 8 (24)                   | 37 (14)                 | 0,125**       |
| Yes                                                               | 254 (85)          |  | 25 (76)                  | 229 (86)                |               |
| <b>10. Number of working hours (week)</b>                         |                   |  |                          |                         |               |
| 35 hours                                                          | 114 (38)          |  | 15 (45)                  | 99 (37)                 | 0,142*        |
| 40 hours                                                          | 110 (37)          |  | 7 (21)                   | 103 (39)                |               |
| 42 hours                                                          | 46 (15)           |  | 5 (15)                   | 41 (15)                 |               |
| Other                                                             | 30 (10)           |  | 6 (18)                   | 24 (9)                  |               |
| <b>11. Distance between home and work (Km), med (P25-P75)</b>     | 7 (4-15)          |  | 8 (6-15)                 | 7 (4-18)                | 0,519§        |
| <b>12. Time taken to reach work (minutes), med (P25-P75)</b>      | 15 (10-30)        |  | 15 (10-25)               | 15 (10-30)              | 0,650§        |
| <b>13. Years of professional experience, med (P25-P75)</b>        | 8 (4-15)          |  | 12 (7-20)                | 8 (4-14)                | <b>0,027§</b> |
| <b>14. Years of professional practice in ICU, med (P25-P75)</b>   | 4 (2-10)          |  | 8 (4-13)                 | 4 (2-9)                 | <b>0,002§</b> |
| <b>15. Contractual situation, n (%)</b>                           |                   |  |                          |                         |               |
| Effective staff member                                            | 134 (45)          |  | 20 (61)                  | 114 (43)                | -             |
| Individual contract of indeterminate period                       | 118 (39)          |  | 9 (27)                   | 109 (41)                |               |
| Fixed-term contract                                               | 18 (6)            |  | 1 (3)                    | 17 (6)                  |               |
| Without institutional link                                        | 4 (1)             |  | 0 (0)                    | 4 (1)                   |               |
| Other                                                             | 26 (9)            |  | 3 (9)                    | 23 (9)                  |               |
| <b>16. Overschedule :</b>                                         |                   |  |                          |                         |               |
| <b>16.1. In another setting from the same institution , n (%)</b> |                   |  |                          |                         |               |
| No                                                                | 241 (90)          |  | 29 (97)                  | 212 (89)                | 0,336**       |
| Yes                                                               | 28 (10)           |  | 1 (3)                    | 27 (11)                 |               |
| <b>16.2. In another health care institution , n (%)</b>           |                   |  |                          |                         |               |
| No                                                                | 158 (56)          |  | 14 (44)                  | 144 (58)                | 0,124*        |
| Yes                                                               | 122 (44)          |  | 18 (56)                  | 104 (42)                |               |

med-median; P- Percentil; \* Independence chi-square test \*\* Fisher exact test; § Mann-Whitney test
